# Supplementary material
Source: MDPI journal article supplement (https://www.mdpi.com/2077-1312/9/6/675)
Supplement: s1 [file s1]

Archive with 2 entries (2 files):
- jmse-1233374 final Supplementary material.pdf
- jmse-1233374 sable_SST_reflex_Rodgveller_041521_checked.xlsx
