# Supplementary material
Source: MDPI journal article supplement (https://www.mdpi.com/2077-1312/9/6/675)
Supplement: s1 [file s1 › jmse-1233374 sable_SST_reflex_Rodgveller_041521_checked.xlsx]

## Sheet: Sheet1
Reflex	FishID	Yes_lab	treatment	spp	Deck_Yes
self_right	20	1	0minute	sablefish	0
self_right	24	1	11minute	sablefish	0
self_right	49	1	11minute	sablefish	0
self_right	21	1	6minute	sablefish	0
self_right	54	1	6minute	sablefish	0
tail_grab	5	1	0minute	Sablefish	1
tail_grab	23	1	0minute	Sablefish	1
tail_grab	34	1	0minute	Sablefish	1
tail_grab	38	1	0minute	Sablefish	1
tail_grab	50	1	0minute	Sablefish	1
tail_grab	13	1	11minute	Sablefish	1
tail_grab	17	1	11minute	Sablefish	1
tail_grab	24	1	11minute	Sablefish	1
tail_grab	29	1	11minute	Sablefish	1
tail_grab	35	1	11minute	Sablefish	1
tail_grab	49	1	11minute	Sablefish	1
tail_grab	59	1	11minute	Sablefish	1
tail_grab	12	1	3minute	Sablefish	1
tail_grab	16	1	3minute	Sablefish	1
tail_grab	27	1	3minute	Sablefish	1
tail_grab	51	1	3minute	Sablefish	1
tail_grab	53	1	3minute	Sablefish	1
tail_grab	55	1	3minute	Sablefish	1
tail_grab	14	1	6minute	Sablefish	1
tail_grab	18	1	6minute	Sablefish	1
tail_grab	33	1	6minute	Sablefish	1
tail_grab	46	1	6minute	Sablefish	1
tail_grab	48	1	6minute	Sablefish	1
tail_grab	4	1	SST1	SST	1
tail_grab	31	1	SST1	SST	1
tail_grab	42	1	SST1	SST	1
tail_grab	43	1	SST1	SST	1
tail_grab	2	1	SST2	SST	1
tail_grab	3	1	SST2	SST	1
tail_grab	30	1	SST2	SST	1
tail_grab	36	1	SST2	SST	1
tail_grab	11	1	SST3	SST	1
tail_grab	39	1	SST3	SST	1
tail_grab	40	1	SST3	SST	1
tail_grab	44	1	SST3	SST	1
tail_grab	45	1	SST3	SST	1
tail_grab	1	1	SST4	SST	1
tail_grab	8	1	SST4	SST	1
tail_grab	10	1	SST4	SST	1
tail_grab	37	1	SST4	SST	1
tail_grab	41	1	SST4	SST	1
self_right	5	1	0minute	sablefish	1
self_right	15	1	0minute	sablefish	1
self_right	23	1	0minute	sablefish	1
self_right	34	1	0minute	sablefish	1
self_right	38	1	0minute	sablefish	1
self_right	50	1	0minute	sablefish	1
self_right	57	1	0minute	sablefish	1
self_right	13	1	11minute	sablefish	1
self_right	17	1	11minute	sablefish	1
self_right	19	1	11minute	sablefish	1
self_right	29	1	11minute	sablefish	1
self_right	35	1	11minute	sablefish	1
self_right	59	1	11minute	sablefish	1
self_right	12	1	3minute	sablefish	1
self_right	16	1	3minute	sablefish	1
self_right	27	1	3minute	sablefish	1
self_right	28	1	3minute	sablefish	1
self_right	51	1	3minute	sablefish	1
self_right	53	1	3minute	sablefish	1
self_right	55	1	3minute	sablefish	1
self_right	58	1	3minute	sablefish	1
self_right	14	1	6minute	sablefish	1
self_right	18	1	6minute	sablefish	1
self_right	26	1	6minute	sablefish	1
self_right	33	1	6minute	sablefish	1
self_right	46	1	6minute	sablefish	1
self_right	48	1	6minute	sablefish	1
sound	5	1	0minute	Sablefish	1
sound	15	1	0minute	Sablefish	1
sound	23	1	0minute	Sablefish	1
sound	34	1	0minute	Sablefish	1
sound	27	1	3minute	Sablefish	1
sound	18	1	6minute	Sablefish	1
sound	2	1	SST2	SST	1
sound	39	1	SST3	SST	1
sound	37	1	SST4	SST	1
operculum_flare	5	1	0minute	Sablefish	1
operculum_flare	15	1	0minute	Sablefish	1
operculum_flare	20	1	0minute	Sablefish	1
operculum_flare	23	1	0minute	Sablefish	1
operculum_flare	34	1	0minute	Sablefish	1
operculum_flare	38	1	0minute	Sablefish	1
operculum_flare	50	1	0minute	Sablefish	1
operculum_flare	57	1	0minute	Sablefish	1
operculum_flare	17	1	11minute	Sablefish	1
operculum_flare	19	1	11minute	Sablefish	1
operculum_flare	24	1	11minute	Sablefish	1
operculum_flare	29	1	11minute	Sablefish	1
operculum_flare	35	1	11minute	Sablefish	1
operculum_flare	49	1	11minute	Sablefish	1
operculum_flare	59	1	11minute	Sablefish	1
operculum_flare	12	1	3minute	Sablefish	1
operculum_flare	16	1	3minute	Sablefish	1
operculum_flare	27	1	3minute	Sablefish	1
operculum_flare	28	1	3minute	Sablefish	1
operculum_flare	51	1	3minute	Sablefish	1
operculum_flare	53	1	3minute	Sablefish	1
operculum_flare	55	1	3minute	Sablefish	1
operculum_flare	58	1	3minute	Sablefish	1
operculum_flare	14	1	6minute	Sablefish	1
operculum_flare	18	1	6minute	Sablefish	1
operculum_flare	21	1	6minute	Sablefish	1
operculum_flare	26	1	6minute	Sablefish	1
operculum_flare	33	1	6minute	Sablefish	1
operculum_flare	46	1	6minute	Sablefish	1
operculum_flare	48	1	6minute	Sablefish	1
operculum_flare	54	1	6minute	Sablefish	1
operculum_flare	6	1	On Boat	SST	1
operculum_flare	32	1	On Boat	SST	1
operculum_flare	4	1	SST1	SST	1
operculum_flare	31	1	SST1	SST	1
operculum_flare	42	1	SST1	SST	1
operculum_flare	43	1	SST1	SST	1
operculum_flare	2	1	SST2	SST	1
operculum_flare	3	1	SST2	SST	1
operculum_flare	30	1	SST2	SST	1
operculum_flare	36	1	SST2	SST	1
operculum_flare	11	1	SST3	SST	1
operculum_flare	39	1	SST3	SST	1
operculum_flare	40	1	SST3	SST	1
operculum_flare	44	1	SST3	SST	1
operculum_flare	45	1	SST3	SST	1
operculum_flare	1	1	SST4	SST	1
operculum_flare	8	1	SST4	SST	1
operculum_flare	10	1	SST4	SST	1
operculum_flare	37	1	SST4	SST	1
operculum_flare	41	1	SST4	SST	1
gag	5	1	0minute	Sablefish	1
gag	15	1	0minute	Sablefish	1
gag	20	1	0minute	Sablefish	1
gag	23	1	0minute	Sablefish	1
gag	34	1	0minute	Sablefish	1
gag	38	1	0minute	Sablefish	1
gag	50	1	0minute	Sablefish	1
gag	57	1	0minute	Sablefish	1
gag	13	1	11minute	Sablefish	1
gag	17	1	11minute	Sablefish	1
gag	19	1	11minute	Sablefish	1
gag	24	1	11minute	Sablefish	1
gag	29	1	11minute	Sablefish	1
gag	35	1	11minute	Sablefish	1
gag	49	1	11minute	Sablefish	1
gag	59	1	11minute	Sablefish	1
gag	12	1	3minute	Sablefish	1
gag	16	1	3minute	Sablefish	1
gag	27	1	3minute	Sablefish	1
gag	28	1	3minute	Sablefish	1
gag	51	1	3minute	Sablefish	1
gag	53	1	3minute	Sablefish	1
gag	55	1	3minute	Sablefish	1
gag	58	1	3minute	Sablefish	1
gag	14	1	6minute	Sablefish	1
gag	18	1	6minute	Sablefish	1
gag	21	1	6minute	Sablefish	1
gag	26	1	6minute	Sablefish	1
gag	33	1	6minute	Sablefish	1
gag	46	1	6minute	Sablefish	1
gag	48	1	6minute	Sablefish	1
gag	54	1	6minute	Sablefish	1
gag	4	1	SST1	SST	1
gag	31	1	SST1	SST	1
gag	42	1	SST1	SST	1
gag	43	1	SST1	SST	1
gag	2	1	SST2	SST	1
gag	3	1	SST2	SST	1
gag	30	1	SST2	SST	1
gag	36	1	SST2	SST	1
gag	11	1	SST3	SST	1
gag	39	1	SST3	SST	1
gag	40	1	SST3	SST	1
gag	44	1	SST3	SST	1
gag	45	1	SST3	SST	1
gag	1	1	SST4	SST	1
gag	8	1	SST4	SST	1
gag	10	1	SST4	SST	1
gag	37	1	SST4	SST	1
gag	41	1	SST4	SST	1
vestibular_ocular	5	1	0minute	Sablefish	1
vestibular_ocular	15	1	0minute	Sablefish	1
vestibular_ocular	20	1	0minute	Sablefish	1
vestibular_ocular	23	1	0minute	Sablefish	1
vestibular_ocular	34	1	0minute	Sablefish	1
vestibular_ocular	38	1	0minute	Sablefish	1
vestibular_ocular	50	1	0minute	Sablefish	1
vestibular_ocular	57	1	0minute	Sablefish	1
vestibular_ocular	13	1	11minute	Sablefish	1
vestibular_ocular	17	1	11minute	Sablefish	1
vestibular_ocular	19	1	11minute	Sablefish	1
vestibular_ocular	24	1	11minute	Sablefish	1
vestibular_ocular	29	1	11minute	Sablefish	1
vestibular_ocular	35	1	11minute	Sablefish	1
vestibular_ocular	49	1	11minute	Sablefish	1
vestibular_ocular	59	1	11minute	Sablefish	1
vestibular_ocular	12	1	3minute	Sablefish	1
vestibular_ocular	16	1	3minute	Sablefish	1
vestibular_ocular	27	1	3minute	Sablefish	1
vestibular_ocular	28	1	3minute	Sablefish	1
vestibular_ocular	51	1	3minute	Sablefish	1
vestibular_ocular	53	1	3minute	Sablefish	1
vestibular_ocular	55	1	3minute	Sablefish	1
vestibular_ocular	58	1	3minute	Sablefish	1
vestibular_ocular	14	1	6minute	Sablefish	1
vestibular_ocular	18	1	6minute	Sablefish	1
vestibular_ocular	21	1	6minute	Sablefish	1
vestibular_ocular	26	1	6minute	Sablefish	1
vestibular_ocular	33	1	6minute	Sablefish	1
vestibular_ocular	46	1	6minute	Sablefish	1
vestibular_ocular	48	1	6minute	Sablefish	1
vestibular_ocular	54	1	6minute	Sablefish	1
vestibular_ocular	4	1	SST1	SST	1
vestibular_ocular	31	1	SST1	SST	1
vestibular_ocular	3	1	SST2	SST	1
vestibular_ocular	30	1	SST2	SST	1
vestibular_ocular	11	1	SST3	SST	1
vestibular_ocular	39	1	SST3	SST	1
vestibular_ocular	8	1	SST4	SST	1
tail_grab	15	1	0minute	Sablefish	0
tail_grab	20	1	0minute	Sablefish	0
tail_grab	57	1	0minute	Sablefish	0
tail_grab	19	1	11minute	Sablefish	0
tail_grab	28	1	3minute	Sablefish	0
tail_grab	58	1	3minute	Sablefish	0
tail_grab	21	1	6minute	Sablefish	0
tail_grab	26	1	6minute	Sablefish	0
tail_grab	54	1	6minute	Sablefish	0
sound	38	1	0minute	Sablefish	0
sound	12	1	3minute	Sablefish	0
sound	33	1	6minute	Sablefish	0
sound	31	1	SST1	SST	0
sound	43	1	SST1	SST	0
sound	3	1	SST2	SST	0
sound	30	1	SST2	SST	0
sound	11	1	SST3	SST	0
sound	45	1	SST3	SST	0
sound	1	1	SST4	SST	0
operculum_flare	13	1	11minute	Sablefish	0
operculum_flare	9	1	On Boat	SST	0
vestibular_ocular	43	1	SST1	SST	0
vestibular_ocular	2	1	SST2	SST	0
vestibular_ocular	40	1	SST3	SST	0
vestibular_ocular	44	1	SST3	SST	0
vestibular_ocular	45	1	SST3	SST	0
vestibular_ocular	1	1	SST4	SST	0
vestibular_ocular	10	1	SST4	SST	0
vestibular_ocular	37	1	SST4	SST	0
vestibular_ocular	41	1	SST4	SST	0
self_right	47	N/A	On Boat	sablefish	0
tail_grab	7	N/A	Ob Boat	Sablefish	1
tail_grab	6	N/A	On Boat	SST	1
tail_grab	9	N/A	On Boat	SST	1
tail_grab	32	N/A	On Boat	SST	1
tail_grab	52	N/A	On Boat	Sablefish	1
tail_grab	56	N/A	On Boat	Sablefish	1
self_right	7	N/A	On Boat	sablefish	1
self_right	6	N/A	On Boat	SST	1
self_right	9	N/A	On Boat	SST	1
self_right	32	N/A	On Boat	SST	1
self_right	52	N/A	On Boat	sablefish	1
self_right	56	N/A	On Boat	sablefish	1
operculum_flare	7	N/A	On Boat	Sablefish	1
operculum_flare	47	N/A	On Boat	Sablefish	1
operculum_flare	52	N/A	On Boat	Sablefish	1
operculum_flare	56	N/A	On Boat	Sablefish	1
gag	7	N/A	On Boat	Sablefish	1
gag	6	N/A	On Boat	SST	1
gag	32	N/A	On Boat	SST	1
gag	47	N/A	On Boat	Sablefish	1
gag	52	N/A	On Boat	Sablefish	1
gag	56	N/A	On Boat	Sablefish	1
vestibular_ocular	7	N/A	On Boat	Sablefish	1
vestibular_ocular	6	N/A	On Boat	SST	1
vestibular_ocular	32	N/A	On Boat	SST	1
vestibular_ocular	52	N/A	On Boat	Sablefish	1
vestibular_ocular	56	N/A	On Boat	Sablefish	1
tail_grab	47	N/A	On Boat	Sablefish	0
sound	7	N/A	On Boat	Sablefish	0
gag	9	N/A	On Boat	SST	0
vestibular_ocular	9	N/A	On Boat	SST	0
vestibular_ocular	47	N/A	On Boat	Sablefish	0
self_right	31	0	SST1	SST	0
self_right	42	0	SST1	SST	0
self_right	43	0	SST1	SST	0
self_right	36	0	SST2	SST	0
self_right	40	0	SST3	SST	0
self_right	44	0	SST3	SST	0
self_right	45	0	SST3	SST	0
self_right	8	0	SST4	SST	0
self_right	4	0	SST1	SST	1
self_right	2	0	SST2	SST	1
self_right	3	0	SST2	SST	1
self_right	30	0	SST2	SST	1
self_right	11	0	SST3	SST	1
self_right	39	0	SST3	SST	1
self_right	1	0	SST4	SST	1
self_right	10	0	SST4	SST	1
self_right	37	0	SST4	SST	1
self_right	41	0	SST4	SST	1
sound	20	0	0minute	Sablefish	1
sound	50	0	0minute	Sablefish	1
sound	57	0	0minute	Sablefish	1
sound	17	0	11minute	Sablefish	1
sound	19	0	11minute	Sablefish	1
sound	35	0	11minute	Sablefish	1
sound	49	0	11minute	Sablefish	1
sound	59	0	11minute	Sablefish	1
sound	16	0	3minute	Sablefish	1
sound	53	0	3minute	Sablefish	1
sound	55	0	3minute	Sablefish	1
sound	46	0	6minute	Sablefish	1
sound	54	0	6minute	Sablefish	1
sound	56	0	On Boat	Sablefish	1
sound	4	0	SST1	SST	1
sound	10	0	SST4	SST	1
vestibular_ocular	36	0	SST2	SST	1
sound	13	0	11minute	Sablefish	0
sound	24	0	11minute	Sablefish	0
sound	29	0	11minute	Sablefish	0
sound	28	0	3minute	Sablefish	0
sound	51	0	3minute	Sablefish	0
sound	58	0	3minute	Sablefish	0
sound	14	0	6minute	Sablefish	0
sound	21	0	6minute	Sablefish	0
sound	26	0	6minute	Sablefish	0
sound	48	0	6minute	Sablefish	0
sound	6	0	On Boat	SST	0
sound	9	0	On Boat	SST	0
sound	32	0	On Boat	SST	0
sound	47	0	On Boat	Sablefish	0
sound	52	0	On Boat	Sablefish	0
sound	42	0	SST1	SST	0
sound	36	0	SST2	SST	0
sound	40	0	SST3	SST	0
sound	44	0	SST3	SST	0
sound	8	0	SST4	SST	0
sound	41	0	SST4	SST	0
vestibular_ocular	42	0	SST1	SST	0
